# Supplementary material
Source: publisher figshare collection journal article supplement (https://tandf.figshare.com/articles/dataset/_/6023981)
Supplement: Supplementary file 1 [file 1]

## Frequency and Percentage of Each Type of Interaction Partner in the Recalled Interactions

| Type of Interaction Partner                                                                | Frequency (Percentage) |             |             |              |
|--------------------------------------------------------------------------------------------|------------------------|-------------|-------------|--------------|
| <u>Sample</u>                                                                              | <u>CH</u>              | <u>AMAB</u> | <u>AMUS</u> | <u>Total</u> |
| He/She was a government official (e.g., police officer).                                   | 1 (0.4%)               | 13 (3.1%)   | 9 (1.7%)    | 23 (1.9%)    |
| He/She was my employer/superior.                                                           | 2 (0.7%)               | 10 (2.4%)   | 24 (4.7%)   | 36 (3.0%)    |
| He/She was my teacher/professor/teaching assistant.                                        | 30 (11.2%)             | 34 (8.1%)   | 33 (6.4%)   | 97 (8.1%)    |
| He/She was someone I did business with (e.g., landlord).                                   | 10 (3.7%)              | 24 (5.7%)   | 29 (5.6%)   | 63 (5.2%)    |
| He/She was someone I had connection with through a third person (e.g., a friend's friend). | 33 (12.3%)             | 74 (17.7%)  | 125 (24.3%) | 232 (19.3%)  |
| He/She was someone I worked or studied with (e.g., classmate, team member).                | 149 (55.6%)            | 123 (29.4%) | 181 (35.1%) | 453 (37.7%)  |
| Other                                                                                      | 43 (16.0%)             | 141 (33.7%) | 114 (22.1%) | 298 (24.8%)  |
| Total                                                                                      | 268 (100%)             | 419 (100%)  | 515 (100%)  | 1202 (100%)  |

*Note.* CH: Chinese in the US sample; AMAB: US Americans who studied abroad sample;

AMUS: US Americans in the US sample.
