# Supplementary material
Source: publisher figshare collection journal article supplement (https://tandf.figshare.com/articles/dataset/_/6023981)
Supplement: Supplementary file 2 [file 1]

Archive with 4 entries (4 files):
- rjii_a_1450889_sm8020.pdf
- rjii_a_1450889_sm8016.pdf
- rjii_a_1450889_sm8014.pdf
- rjii_a_1450889_sm8011.pdf
