# Supplementary material
Source: publisher figshare collection journal article supplement (https://tandf.figshare.com/articles/dataset/_/6023981)
Supplement: Supplementary file 2 [file 1 › rjii_a_1450889_sm8011.pdf]

## An Example of Mplus Code: Testing Configural Invariance of the “Before” Model

```

TITLE:
  before measurement model 3 groups configural inv
DATA:
  FILE (ch) IS CH_for_mplus2.csv;
  FILE (amab) IS AMAB_for_mplus.csv;
  FILE (amus) IS AMUS_for_mplus.csv;

VARIABLE:
  NAMES ARE faceunb1-faceunb8 loseprb1-loseprb4 icab1-icab14
  intengb1-intengb4 faceund1-faceund8
  loseprd1-loseprd4 fawork1-fawork6
  icad1-icad14 intcond1-intcond4 novimm1-novimm26
  vbimm1-vbimm15 import1-import4;

  USEVARIABLES = faceunb1-faceunb8 loseprb1-loseprb4 icab2 icab4
  icab6 icab8 icab11 icab13 icab14 intengb1-intengb4 import1-import4;

MODEL:
  faceunb BY faceunb1-faceunb8;
  loseprb BY loseprb1-loseprb4;
  icab BY icab2 icab4 icab6 icab8 icab11 icab13 icab14;
  intengb BY intengb1-intengb4;
  import BY import1-import4;

  [faceunb1-faceunb8 loseprb1-loseprb4 icab2 icab4 icab6 icab8
  icab11 icab13 icab14 intengb1-intengb4 import1-import4];

  [faceunb-import@0];

MODEL amab:
  faceunb BY faceunb2-faceunb8;
  loseprb BY loseprb2-loseprb4;
  icab BY icab4 icab6 icab8 icab11 icab13 icab14;
  intengb BY intengb2-intengb4;
  import BY import2-import4;

```

#The above five lines were deleted when testing pattern invariance so that loadings were not modeled separately for this sample.#

```

[faceunb1-faceunb8 loseprb1-loseprb4 icab2 icab4 icab6 icab8
icab11 icab13 icab14 intengb1-intengb4 import1-import4];

MODEL amus:
  faceunb BY faceunb2-faceunb8;
  loseprb BY loseprb2-loseprb4;
  icab BY icab4 icab6 icab8 icab11 icab13 icab14;
  intengb BY intengb2-intengb4;
  import BY import2-import4;

```

#The above five lines were deleted when testing pattern invariance so that loadings were not modeled separately for this sample.#

```
[faceunb1-faceunb8 loseprb1-loseprb4 icab2 icab4 icab6 icab8  
icab11 icab13 icab14 intengb1-intengb4 import1-import4];
```

OUTPUT:

```
sampstat standardized modindices(10);
```
