# Supplementary material
Source: publisher figshare collection journal article supplement (https://tandf.figshare.com/articles/dataset/_/6023981)
Supplement: Supplementary file 2 [file 1 › rjii_a_1450889_sm8014.pdf]

## Descriptive Statistics of Variables and Results of ANOVA

| Variable Name                       | <i>Mean (SD)</i>                |                                |                                |              |
|-------------------------------------|---------------------------------|--------------------------------|--------------------------------|--------------|
|                                     | Cronbach's $\alpha$             |                                |                                |              |
| <u>Sample</u>                       | <u>CH</u>                       | <u>AMAB</u>                    | <u>AMUS</u>                    | <u>Total</u> |
| Face Uncertainty (Before)           | 4.58(1.85) <sub>a</sub><br>.93  | 4.81(1.77) <sub>a</sub><br>.91 | 4.26(1.91) <sub>b</sub><br>.91 | 4.52(1.86)   |
| Face Uncertainty (During)           | 4.44(1.84) <sub>b</sub><br>.95  | 4.78(1.91) <sub>a</sub><br>.94 | 4.09(2.03) <sub>c</sub><br>.94 | 4.41(1.97)   |
| Probability of Losing Face (Before) | 3.15(1.99) <sub>a</sub><br>.95  | 3.08(1.89) <sub>a</sub><br>.94 | 2.27(1.52) <sub>b</sub><br>.93 | 2.75(1.81)   |
| Probability of Losing Face (During) | 3.33(1.97) <sub>a</sub><br>.97  | 3.30(1.98) <sub>a</sub><br>.95 | 2.38(1.72) <sub>b</sub><br>.96 | 2.91(1.92)   |
| Interaction Importance              | 5.50(2.00) <sub>ab</sub><br>.88 | 5.82(1.97) <sub>a</sub><br>.86 | 5.47(2.32) <sub>b</sub><br>.92 | 5.60(2.14)   |
| ICA (Before)                        | 3.76(1.89) <sub>a</sub><br>.95  | 3.87(1.89) <sub>a</sub><br>.93 | 3.09(1.76) <sub>b</sub><br>.93 | 3.51(1.87)   |
| ICA (During)                        | 3.84(1.86) <sub>a</sub><br>.95  | 3.90(1.91) <sub>a</sub><br>.94 | 3.08(1.84) <sub>b</sub><br>.95 | 3.54(1.91)   |
| Intention to Engage                 | 5.82(1.89) <sub>a</sub><br>.89  | 6.05(2.01) <sub>a</sub><br>.90 | 5.99(2.09) <sub>a</sub><br>.91 | 5.97(2.02)   |
| Intention to Continue               | 5.99(1.97) <sub>a</sub><br>.92  | 6.12(2.20) <sub>a</sub><br>.95 | 5.89(2.20) <sub>a</sub><br>.94 | 5.99(2.13)   |
| Facework                            | 6.28(1.56) <sub>a</sub><br>.93  | 6.32(1.71) <sub>a</sub><br>.90 | 6.24(1.80) <sub>a</sub><br>.91 | 6.28(1.72)   |
| Nonverbal Immediacy                 | 6.27(1.64) <sub>c</sub><br>.86  | 6.76(1.71) <sub>b</sub><br>.87 | 7.28(1.51) <sub>a</sub><br>.84 | 6.87(1.66)   |
| Verbal Immediacy                    | 5.83(1.57) <sub>a</sub><br>.78  | 6.03(1.86) <sub>a</sub><br>.83 | 5.78(1.90) <sub>a</sub><br>.77 | 5.88(1.82)   |
| Sample Size                         | 268                             | 419                            | 515                            | 1202         |

*Note.* CH: Chinese in the US sample; AMAB: US Americans who studied abroad sample;

AMUS: US Americans in the US sample. Each variable was computed by taking the average of all the items for that variable if there were no fewer than two responses. One-way ANOVA was conducted for each variable across the three samples. The subscripts show the results of the post hoc tests: Sample means that did not differ significantly were assigned the same subscript. The subscripts a, b, and c were assigned to means ranked from the highest to the lowest.
